# Supplementary material
Source: HighWire-hosted journal article supplement (https://sti.bmj.com/content/96/2/137)
Supplement: inline-supplementary-material-1 [file inline-supplementary-material-1.pdf]

## TECHNICAL APPENDIX

HPA:LG6



## LGV Enhanced Surveillance Pilot Form

To be completed for confirmed/suspected cases of male rectal chlamydia

Clinic patient attended: ..... Reported by: .....

Patient clinic number: ..... Patient lab number: ..... Date: ...../...../.....

**CONFIDENTIAL**

**1** Age ..... **2** Country of birth ..... **3** Country of residence .....

**4** Sexuality  Homosexual  Heterosexual  Bisexual  Unknown

**5** Date of attendance (dd/mm/yy) ...../...../.....

**6** Reason(s) for attending  Symptoms  Referral  Contact tracing  Unknown  Routine STI screen  
Other (please specify): .....

**7** Proctitis symptoms  Yes  No

**8** Antibiotic treatment

|                               | Dose (mg)            | Course (days)        |
|-------------------------------|----------------------|----------------------|
| Doxycycline                   | <input type="text"/> | <input type="text"/> |
| Azithromycin                  | <input type="text"/> | <input type="text"/> |
| Erythromycin                  | <input type="text"/> | <input type="text"/> |
| Other (please specify): ..... | <input type="text"/> | <input type="text"/> |

Not treated

**9** Previous HIV diagnosis  Yes  No  Unknown

**ADDITIONAL RISK FACTOR INFORMATION TO BE COLLECTED IF AVAILABLE**

**10** Other STI(s) diagnosed at presentation (on date in Question 5)

None  Gonorrhoea  NSU  Syphilis  Genital warts  
 Genital herpes  Hepatitis B  Hepatitis C  HIV

Other (please specify): .....

**11** Previous chlamydia diagnosis in the past 12 months  Yes  No  Unknown

**12** Country/countries where the patient has had sex in the previous 3 months  
Specify if known e.g. City, country: .....

**13** Number of sexual contact involving receptive anal intercourse in the last 3 months .....  Unknown

**14** Recreational drug use immediately before or during sex (chemsex) in the last 3 months  Yes  No  
If yes, please tick all applicable:  Unknown

Crystal meth  Mephedrone/M-CAT  GHB/GBL  Other (please specify): .....

If you want to report any further information relevant to LGV surveillance please tick this box and write on the other side of this sheet
